# Supplementary material for: Humanitarian need drives multilateral disaster aid
Source: PubMed Central journal article supplement — Proc Natl Acad Sci U S A. 2021 Jan 21;118(4):e2018293118. doi: 10.1073/pnas.2018293118 (PMC7848546; doi:10.1073/pnas.2018293118), 2021-01-21
Supplement: pnas.2018293118.sapp.pdf [file pnas.2018293118.sapp.pdf]

**Supplementary Information for**

## **Humanitarian Need Drives Multilateral Disaster Aid**

Lisa M. Dellmuth, Frida A.-M. Bender, Aiden Jönsson, Elisabeth Rosvold, and Nina von Uexkull

Corresponding author: Lisa Dellmuth, Stockholm University

Email: [lisa.dellmuth@su.se](mailto:lisa.dellmuth@su.se)

**This PDF file includes a detailed description of how we conducted the meteorological re-analysis, collected the social data and developed the metrics, followed by a detailed overview of robustness checks.**

SI Text

Tables S1 to S21

Figure S1

SI References

## SI Text

### Validation of disaster data and calculation of hazard severity

In the investigation of factors determining the distribution of United Nations (UN) disaster aid, the frequency of occurrence and degree of extremity of meteorological events are used to represent physical *hazard severity*. For deriving a hazard severity measure which captures meteorological extremes, a global-scale, temporally complete set of meteorological data is needed. While meteorological observations taken at fixed measurement sites capture point magnitudes with high accuracy, they are few and far apart. In-situ observations are also not easily utilized due to operational inconsistencies and uneven geographic density of measurement stations (1, 2), leading to difficulties in developing a reliable global data set spanning all countries. Another type of historical data, meteorological reanalysis, allows estimates of past atmospheric conditions by assimilating and combining observational data with forecasting models to reconstruct spatially and temporally coherent records. There are limits to the abilities of reanalysis methods in reproducing the absolute magnitude of local extremes in meteorological variables, primarily due to model resolution – it is not feasible to model at spatial scales small enough to resolve such processes as convection leading to convective storms or cloudbursts (3, 4), variations in terrain on the sub-grid scale leading to deviations of wind speeds from the grid cell mean (5), and impacts of the urban landscape on surface temperature extremes (6). Despite these limitations, using a reanalysis data set provides a coherent data set with the required global coverage and daily resolution.

We use the European Center for Medium-range Weather Forecast's ERA-Interim reanalysis data (7), based on the IFS Cy31r2 forecast model, to test the types of disasters most likely to be closely linked to controlling meteorological factors: flooding (high daily and 30-day accumulated precipitation), cold waves (low daily minimum temperatures at 2 m above surface), heat waves (high daily maximum temperatures at 2 m above surface), storms (high daily maximum sustained wind speeds at 10 m above surface), and drought (low 90- and 180-day accumulated precipitation). A spatial grid resolution of  $0.75^{\circ} \times 0.75^{\circ}$  (at the equator: 83.5 km in the east-west direction, 82.9 km in the north-south direction) is used. Precipitation values are derived from daily sums of total precipitation and summation on different time scales. Maxima and minima in temperature and wind speed are taken from 3-hourly time steps. Temperature maxima and minima derived from retrieving 3-hourly time steps has been shown to better represent observations than those retrieved from 12-hourly time steps (8). Here, the same method has been applied in determining daily maximum wind speed at 10 m (the ERA-Interim daily variable most suited to represent near-surface wind values).

The analysis of meteorological severity presented in this study is carried out using comparisons of distributions of values and their frequency of occurrence, rather than using the absolute magnitudes of local extremes in terms of physical quantities, as the latter may not be accurately represented in the given record. They may be lost to area averaging, or the physical processes leading to them may not be resolved at the scale of the grid cell. Therefore, we must instead assume that the extreme meteorological events on smaller scales are driven, or represented by anomalous circumstances on a larger scale. Extremes are thus here defined and interpreted in the context of a parameter value's place in the overall distribution of values of that parameter, from the same atmospheric reanalysis, and are thus standardized and comparable.

This approach is common in detecting and measuring droughts using the standardized precipitation index (SPI), which is defined as the accumulated precipitation's number of standard deviations from the climatological mean (9). Using differing time scales allows a number of conditions to be examined: shorter time scales can impact soil moisture and thus agriculture, but not reservoirs or groundwater, leaving urban areas relatively unaffected (10). High accumulated precipitation in the short- to medium-term time scale may also cause high stream flow and increased flooding conditions. For these reasons, different time scales are compared for floods (daily and 30-day) and droughts (90-day and 180-day) in order to determine which time scales are more representative of extreme conditions in ERA-Interim. For droughts, the use of 3-month (here 90 days) accumulated precipitation accounts for seasonal variation (11), but a longer 6-month (here 180 days) accumulation time scale is also compared here to account for variation between years. For both floods and droughts, however,

circumstances leading to the disaster may include other factors (both meteorological and not) such as soil moisture and humidity, which other, more complex indices take into account (12).

Similarly, the upper percentile values of overall daily maximum wind speed distributions have been used as a measure of storminess, which can refer to both frequency and intensity of storms, capable of causing a damaging impact upon society, for the purpose of insurance models and projections for hazards in future climates (13, 14). As wind gust fields are parameterized in models and are highly dependent upon topography, the use of wind gusts present problems with high variation within the scale of a single grid cell and thus sustained wind speed are preferred here, the use of which may lead to an underestimation in the true extremity of wind conditions during storms as instantaneous gusts are the likely meteorological condition to cause damage (15).

Comparisons of model extremes and climatological distributions of meteorological variables to observations is of keen interest in ongoing research. In recent years, it has led to the emergence of a field within meteorology known as *attribution analysis*, referring to the process of quantifying the contributions of factors such as anthropogenic global warming to an extreme event by investigating the circumstances leading up to the event and the range of physical conditions that lead to its occurrence (16). The ongoing research in attribution of weather progresses understanding of the performance of models (both global climate models and forecast models such as those used for reanalysis) in reproducing extreme events and their frequency, as well as methods of defining and detecting meteorological extremes. Similar to statistical methods used in attribution studies (17), here we use distributions of reanalysis data in order to describe extreme circumstances in comparison to a reference state as a measure of hazard severity.

#### *Step 1: Validation of EM-DAT disaster data*

In order to assess the ability of the reanalysis data to capture extreme meteorological events that coincide with reported disasters, the reanalysis data set is first checked against disasters reported in the Emergency Events Database (EM-DAT) (18). In order to identify the location of these disasters, we rely on a geocoded extension of the EM-DAT (23). From this dataset we obtain geographic information on the first-order administrative units within a country that were reported to be affected by the different disasters from EM-DAT. A variety of variables are used to detect signals of ERA-Interim statistical extremes that coincide with EM-DAT-listed disasters. Statistical extremes refer to a shift in the distribution of the meteorological variable during reported disasters, away from the climatological distribution in the reanalysis, representing abnormally high or low values in the given variable.

To test ERA-Interim values during EM-DAT-reported extreme conditions against all-time values, we use EM-DAT-reported disasters of the aforementioned types during the period 2006-2018, including only those events that also contain information of the administrative regions and dates of the disasters. We extract the corresponding ERA-Interim data, and the distributions of these extracted values are compared to the overall distributions of the variable during the same time period to detect a shift towards extremes using Welch's unequal variance t-test; the results of this comparison and of the tests are included in Figure 1 in the main paper. Overall distributions of the variables use values from grid cells which contain land, and with latitudes south of 60° S removed in order to best represent inhabited regions.

#### *Step 2: Creation of hazard severity measure*

After validating ERA-Interim meteorological data's coincidence of upper-/lower-percentile values with EM-DAT-listed disasters, a yearly measure of the frequency of extreme events in each country is introduced. We then define ERA-Interim values of the corresponding meteorological variable in terms of its place in its overall distribution as its percentile ranking over the 1981-2018 period; this is done individually for each grid cell in order to best represent its local climate. The percentile ranking is generated with the nearest-rank method, with the percentile  $P$  calculated using the ordinal rank of the meteorological variable  $n$  in the overall distribution of sample size  $N$  listed by increasing values, with  $P = \frac{n}{N} \times 100$ . The 1981-2018 distributions of each meteorological variable are used to calculate the number of days per year in which the values exceeded two standard deviations from the climatological mean within the boundaries of each administrative region at the country level. That is: for floods, the number of days per year with daily precipitation exceeding two standard deviations above the mean; for droughts, the number of days per year with 180-day accumulated precipitation exceeding two

standard deviations below the mean; for storms, the number of days per year with maximum sustained wind speed exceeding two standard deviations above the mean; for heat waves, the number of days with daily maximum temperatures exceeding two standard deviations above the mean; for cold waves, the number of days with daily minimum temperatures exceeding two standard deviations below the mean. Shapefiles of the administrative regions used to mask ERA-Interim in this step were sourced from GADM (19).

These values are then divided by the number of data points (grid cells) available from ERA-Interim in each administrative region to normalize the measure across countries. The result is a record of measures of annual frequency of meteorological extremes in each administrative state, which is used in the regression analysis of UN disaster aid. This hazard severity measure is highly correlated with a dummy variable indicating floods (=1) ( $r=0.877$ ,  $N=1,740$ , see Table S2). This is probably because floods are the most frequently occurring disaster type in the analysis, partially causing this high correlation. Almost 40 percent of the disasters we study are floods.

### **Social data collection and coding**

The dataset is coded at the level of disasters, which are clustered in disaster types, countries, and years. See “Materials and Methods” in the main paper and Table S1 for an overview of all indicators and the level of analysis at which they are coded. Floods are the most frequently occurring disaster type in the analysis, that is, almost 40% of the disasters we study (followed by storms at 23%).

We coded aid flows to specific disasters that were either explicitly or implicitly linked to climate in UN documents. We consulted Central Emergency Relief Fund (CERF) documents, the Financial Tracking Service database, and where needed, media sources from reputable newspapers such as The Guardian, and individual project reporting sheets with more disaggregated numbers and purposes of spending. For example, in Guatemala, which experienced a drought in 2014, documents also mention riverine flooding, a tropical cyclone, and severe winter conditions (20, 21). In this case, we combined the aid estimated by the UN as required to meet humanitarian need, and the aid received for all of these occurrences in 2014, and divided them by five to match them to the five disasters reported in EM-DAT.

Based on this coding process, we created three variables described in the paper: immediate short-run aid through the CERF, long-term disaster reconstruction aid via the Country Based Pooled Funds (CBPF), and other bilateral and multilateral aid coordinated by the UN. The CERF complements the CBPF contributions by being able to more flexibly and quickly react to disasters. For example, in 2017 Ethiopia experienced the worst El Niño induced drought in 50 years, which affected mainly pastoralist communities in southern and eastern parts of the country. The drought was a result of two consecutive failed rainy seasons starting in 2016, and affected the livelihoods, food security, and health of about 4.6 million Ethiopians. In total 133 million funds could be raised, among them about 18,5 million from the CERF, 37,8 million from the Country-based Pool Funds, and 76,7 million from other bilateral or multilateral sources (22).

We complement these aid data with a number of indicators of hazard severity (Table 1 in the main paper), humanitarian need, and strategic interests for the main tables. For the robustness checks, we added disaster-level population density and country-level measures of Gross Domestic Product (GDP), trade in percent of GDP, and infant mortality. In terms of strategic variables, we include PTAs signed, former P5 colony, oil endowment, UN General Assembly (UNGA) voting in line with the United States (US), and an estimation of emergency Official Development Assistance (ODA) in the main tables. In the robustness checks, we add variables capturing if recipient countries are temporary UN Security Council (UNSC) members, recipients of IMF assistance, subject to US sanctions, and ideologically distant or close to the US in UNGA sessions.

The population density and emergency ODA indicators used require brief discussion. Population density is coded using geocoded disaster data (23) to extract area-weighted values for their population density from the Gridded Population of the World, Version 4, Revision 11 data set (24). The variable is coded at 2.5 arc-minute (roughly 5 km) resolution and matched to the disasters in our dataset by using the EM-DAT identifier or by averaging the observations at the level of disaster type. The most recent yearly data of the years 2000, 2005, 2010 and 2015 prior to the disaster were used; for a disaster in e.g. 2007, population density data from the 2005 census was used. The geocoded

dataset was not generated in conjunction with our dataset and contains a selection of 2150 disasters in the categories of cold and heat waves, droughts, floods, and storms, which only partially overlaps with our dataset. We were able to match 1,145 observations for population density.

In terms of emergency ODA, we control for the fact that the UN and other bilateral or multilateral donors might in their disaster funding anticipate the amount of emergency ODA in each year (25). The allocation of ODA more generally has been shown to depend on specific variables, which is why we first regress emergency ODA in each country in each year on these determinants (GDP, corruption, state fragility, and affected people). The generalized residuals from this regression comprises the additional information on humanitarian funding that is not explained by these determinants, is then entered as explanatory variable into the models on CERF and bilateral funding. So, we include that part of humanitarian funding left unexplained by the variables included in our model, thereby avoiding multicollinearity and endogeneity (26).

**Table S1. Variable descriptions**

| Variable                             | Description                                                                                                                                                                                                                                                                                                                                                                                                                                                                                                                                                                                                                                                                                                                                                                                                                                                                                                                                                                                                                                                                                                                                                                                                                                                                                                                                                               | Source                                                                                                    |
|--------------------------------------|---------------------------------------------------------------------------------------------------------------------------------------------------------------------------------------------------------------------------------------------------------------------------------------------------------------------------------------------------------------------------------------------------------------------------------------------------------------------------------------------------------------------------------------------------------------------------------------------------------------------------------------------------------------------------------------------------------------------------------------------------------------------------------------------------------------------------------------------------------------------------------------------------------------------------------------------------------------------------------------------------------------------------------------------------------------------------------------------------------------------------------------------------------------------------------------------------------------------------------------------------------------------------------------------------------------------------------------------------------------------------|-----------------------------------------------------------------------------------------------------------|
| <i>Variables in main models</i>      |                                                                                                                                                                                                                                                                                                                                                                                                                                                                                                                                                                                                                                                                                                                                                                                                                                                                                                                                                                                                                                                                                                                                                                                                                                                                                                                                                                           |                                                                                                           |
| CERF aid                             | Disaster level clustered in countries and years. Total CERF aid in million USD in 2010 prices.                                                                                                                                                                                                                                                                                                                                                                                                                                                                                                                                                                                                                                                                                                                                                                                                                                                                                                                                                                                                                                                                                                                                                                                                                                                                            | CERF documents at <a href="https://cerf.un.org/">https://cerf.un.org/</a>                                 |
| CBPF aid                             | Disaster level clustered in countries and years. Total CBPF aid in million USD in 2010 prices.                                                                                                                                                                                                                                                                                                                                                                                                                                                                                                                                                                                                                                                                                                                                                                                                                                                                                                                                                                                                                                                                                                                                                                                                                                                                            | Financial Tracking Service, CERF documents                                                                |
| Other bilateral and multilateral aid | Disaster level clustered in countries and years. Total amount of remaining aid not flowing through CERF and CBPF from all sources.                                                                                                                                                                                                                                                                                                                                                                                                                                                                                                                                                                                                                                                                                                                                                                                                                                                                                                                                                                                                                                                                                                                                                                                                                                        | Financial Tracking Service, CERF documents                                                                |
| Hazard severity                      | Disaster and country level. The number of events per year within a country's borders which exceeds 2 standard deviations of normal levels, normalized by the number of grid cells that the country covers. In the case of floods, this corresponds to the number of days per grid cell where the daily precipitation anomaly exceeded 2 standard deviations ( $SPI_{1d} > 2.0$ , where $SPI_{1d}$ refers to the standardized precipitation index for the scale of one day in standard deviations. In the case of droughts, this refers to the number of days per cell where the 180-day (6-month) accumulated precipitation anomaly $SPI_{6m}$ was more than 2 standard deviations below the mean ( $SPI_{6m} < -2.0$ ). For storms, this is the number of days per cell where the daily maximum sustained wind speed $U_{max}$ exceeded 2 standard deviations above the mean ( $\Delta U_{max} > 2 \sigma$ ). Regarding extreme temperature, we distinguish between heat waves, where hazard severity is the number of days per cell where the daily maximum temperature at 2 m $T_{max}$ exceeded 2 standard deviations above the mean ( $\Delta T_{max} > 2 \sigma$ ). For cold waves, this refers to the number of days per cell where the daily minimum temperature at 2 m $T_{min}$ exceeded 2 standard deviations below the mean ( $\Delta T_{min} < -2 \sigma$ ). | (18, 23)                                                                                                  |
| Total affected persons (log)         | Disaster level, clustered in countries and years. Total number of affected people by a disaster (logarithmized).                                                                                                                                                                                                                                                                                                                                                                                                                                                                                                                                                                                                                                                                                                                                                                                                                                                                                                                                                                                                                                                                                                                                                                                                                                                          | (18)                                                                                                      |
| State fragility index                | Country level, coded yearly. Index based on variables in the following four categories: cohesion, social, economic, and political.                                                                                                                                                                                                                                                                                                                                                                                                                                                                                                                                                                                                                                                                                                                                                                                                                                                                                                                                                                                                                                                                                                                                                                                                                                        | The Fund for Peace dataset at <a href="https://fragilestatesindex.org">https://fragilestatesindex.org</a> |
| PTAs signed                          | Country level. Number of preferential trade agreements (PTAs) signed by recipient state in a given year.                                                                                                                                                                                                                                                                                                                                                                                                                                                                                                                                                                                                                                                                                                                                                                                                                                                                                                                                                                                                                                                                                                                                                                                                                                                                  | (27)                                                                                                      |
| Former P5 colony                     | Country level. Dummy coded 1 if a country has been a former P5 colony since 1816, and 0 otherwise.                                                                                                                                                                                                                                                                                                                                                                                                                                                                                                                                                                                                                                                                                                                                                                                                                                                                                                                                                                                                                                                                                                                                                                                                                                                                        | (28)                                                                                                      |
| Oil endowment                        | Country level. The extrapolated variable $lnacorcount$ , by unique country identifier and year. The measure expresses the natural logarithm of the total number of onshore oil                                                                                                                                                                                                                                                                                                                                                                                                                                                                                                                                                                                                                                                                                                                                                                                                                                                                                                                                                                                                                                                                                                                                                                                            | (29)                                                                                                      |

|                                                |                                                                                                                                                                                                                                                                                                                                                                                                                     |                                                                                                                                                   |
|------------------------------------------------|---------------------------------------------------------------------------------------------------------------------------------------------------------------------------------------------------------------------------------------------------------------------------------------------------------------------------------------------------------------------------------------------------------------------|---------------------------------------------------------------------------------------------------------------------------------------------------|
|                                                | and gas fields intersecting with a country's territory in 1982. Based on the new ACOR data.                                                                                                                                                                                                                                                                                                                         |                                                                                                                                                   |
| Emergency ODA (residual)                       | Country level. Generalized residuals from ordinary least squares regression of yearly emergency ODA on <i>GDP, corruption, state fragility, and affected people</i> .                                                                                                                                                                                                                                               | (18, 30)                                                                                                                                          |
| UNGA voting with the US                        | Country level. Voting similarity index between country and US in a given session, coded as the share of total votes of a recipient country aligned with the US in each session. During our observed time period, the dataset includes one session per country per year.                                                                                                                                             | (31)                                                                                                                                              |
| Conflict                                       | Country level. Dummy coded 1 if the maximum intensity of armed internal conflict a government was involved in during a particular year, irrespective of conflict was minor or major (i.e., with more than 1000 deaths). 0 otherwise.                                                                                                                                                                                | (32, 33)                                                                                                                                          |
| Drought                                        | Disaster level, clustered in countries and years. Dummy indicating 1 if a drought and 0 if otherwise.                                                                                                                                                                                                                                                                                                               | (18)                                                                                                                                              |
| Extreme temperature and co-occurring disasters | Disaster level, clustered in countries and years. Dummy indicating 1 if extreme heat waves or cold waves, and 0 if otherwise.                                                                                                                                                                                                                                                                                       | (18)                                                                                                                                              |
| Flood                                          | Disaster level, clustered in countries and years. Dummy indicating 1 if a coastal, flash or riverine flood, or other flood, and 0 if otherwise.                                                                                                                                                                                                                                                                     | (18)                                                                                                                                              |
| Storm                                          | Disaster level, clustered in countries and years. Dummy indicating 1 if a convective storm, tropical cyclone, cyclone, extra-tropical storm, or other storm, and 0 if otherwise.                                                                                                                                                                                                                                    | (18)                                                                                                                                              |
| <i>Variables in robustness checks</i>          |                                                                                                                                                                                                                                                                                                                                                                                                                     |                                                                                                                                                   |
| Corruption                                     | Country level. Corruption perception index in a given year.                                                                                                                                                                                                                                                                                                                                                         | Transparency International at <a href="https://www.transparency.org/research/cpi/overview">https://www.transparency.org/research/cpi/overview</a> |
| GDP per capita in PPP                          | Country level. GDP per capita in Purchasing Power Parity (PPP) in a given year.                                                                                                                                                                                                                                                                                                                                     | World Development Indicator at <a href="https://data.worldbank.org/">https://data.worldbank.org/</a>                                              |
| Ideological distance to US                     | Country level. Absolute distance between a country and the US' respective ideal points, based on UNGA voting data in a given year.                                                                                                                                                                                                                                                                                  | (31)                                                                                                                                              |
| IMF program                                    | Country level. Dummy that is 1 if a country is partner to an IMF program in a given year, and 0 otherwise. IMF programs include Extended Fund Facility Arrangements, Exogenous Shock Facility Arrangements, Flexible Credit Line Arrangements, Precautionary Credit Line Arrangements, Precautionary and Liquidity Line Arrangement, Poverty Reduction and Growth Facility Arrangement, Standby Arrangement agreed. | (34)                                                                                                                                              |

|                       |                                                                                                                                                                                                                                                                                            |                                                                                                      |
|-----------------------|--------------------------------------------------------------------------------------------------------------------------------------------------------------------------------------------------------------------------------------------------------------------------------------------|------------------------------------------------------------------------------------------------------|
| Infant mortality      | Country level. Number of infants dying before reaching one year of age, per 1,000 live births in a given year.                                                                                                                                                                             | World Development Indicator at <a href="https://data.worldbank.org/">https://data.worldbank.org/</a> |
| Population density    | Disaster level, clustered in countries and years. Expressed in inhabitant per roughly 5 km resolution. Area-weighted values for population density at 2.5 arc-minute (roughly 5 km) resolution. The most recent data of the years 2000, 2005, 2010 and 2015 prior to a disaster were used. | (23, 24)                                                                                             |
| US sanctions          | Country level. Dummy coded 1 if a country is subject to US sanctions in a given year and 0 otherwise.                                                                                                                                                                                      | (35)                                                                                                 |
| Temporary UNSC member | Country level. Rotating seat in the UN Security Council (UNSC). Dummy that is 1 if the country is a temporary UNSC member in a given year and 0 otherwise.                                                                                                                                 | (36, 37)                                                                                             |
| Trade in % of GDP     | Country level. Total exports and imports as a percentage of GDP in a given year.                                                                                                                                                                                                           | World Development Indicator at <a href="https://data.worldbank.org/">https://data.worldbank.org/</a> |

*Notes:* These variables are either included in the tables in the paper or the robustness checks in this Appendix. Listed in the order they occur.



**Table S2. Correlations between independent variables in main models**

|                                                | 1.     | 2.     | 3.     | 4.     | 5.     | 6.     | 7.     | 8.     | 9.     | 10.    | 11.    | 12.    | 13.   |
|------------------------------------------------|--------|--------|--------|--------|--------|--------|--------|--------|--------|--------|--------|--------|-------|
| 1. Hazard severity                             | 1.000  |        |        |        |        |        |        |        |        |        |        |        |       |
| 2. Total affected                              | 0.239  | 1.000  |        |        |        |        |        |        |        |        |        |        |       |
| 3. State fragility                             | -0.039 | 0.008  | 1.000  |        |        |        |        |        |        |        |        |        |       |
| 4. PTAs signed                                 | 0.019  | -0.027 | -0.211 | 1.000  |        |        |        |        |        |        |        |        |       |
| 5. P5 colony                                   | 0.030  | 0.041  | 0.063  | 0.000  | 1.000  |        |        |        |        |        |        |        |       |
| 6. Oil endowment                               | -0.010 | -0.021 | -0.146 | 0.204  | 0.075  | 1.000  |        |        |        |        |        |        |       |
| 7. Emergency ODA                               | -0.010 | -0.002 | -0.082 | -0.001 | 0.113  | -0.016 | 1.000  |        |        |        |        |        |       |
| 8. UNGA voting with the US                     | 0.005  | -0.049 | -0.122 | -0.041 | -0.019 | 0.005  | -0.001 | 1.000  |        |        |        |        |       |
| 9. Conflict                                    | -0.008 | -0.093 | 0.169  | 0.117  | 0.287  | 0.229  | 0.159  | 0.010  | 1.000  |        |        |        |       |
| 10. Drought                                    | -0.237 | 0.125  | 0.022  | -0.022 | -0.040 | -0.087 | -0.002 | 0.016  | -0.050 | 1.000  |        |        |       |
| 11. Ex. temperature and co-occurring disasters | -0.110 | -0.140 | -0.004 | -0.023 | -0.061 | -0.016 | 0.112  | 0.071  | 0.066  | -0.105 | 1.000  |        |       |
| 12. Flood                                      | 0.877  | 0.244  | -0.036 | 0.012  | 0.019  | -0.006 | -0.026 | -0.016 | 0.001  | -0.275 | -0.301 | 1.000  |       |
| 13. Storm                                      | -0.303 | 0.034  | -0.072 | 0.016  | 0.042  | 0.039  | -0.047 | -0.010 | -0.030 | -0.131 | -0.143 | -0.374 | 1.000 |

Notes: Pearson's correlation coefficients ( $r$ ). These variables are either included in the tables in the paper or the robustness checks in this Appendix. Listed in the order they occur.  $N=1,740$ .

**Table S3. Summary statistics**

| <b>Variable</b>                                | <b>Min.</b> | <b>Mean</b> | <b>Max.</b> | <b>Std. Dev.</b> | <b>N</b> |
|------------------------------------------------|-------------|-------------|-------------|------------------|----------|
| CERF aid                                       | 0.000       | 0.010       | 0.920       | 0.030            | 3,590    |
| CBPF aid                                       | 0.000       | 0.030       | 8.040       | 0.290            | 3,590    |
| Other bilateral and multilateral aid           | 0.000       | 0.000       | 0.550       | 0.020            | 3,590    |
| Hazard severity                                | 0.000       | 26.920      | 115.800     | 26.850           | 3,590    |
| Total affected persons (log)                   | -6.910      | 0.380       | 12.710      | 4.660            | 3,590    |
| State fragility index                          | 17.000      | 74.830      | 115.000     | 23.410           | 2,652    |
| PTAs signed                                    | 0.000       | 0.730       | 25.000      | 1.620            | 3,590    |
| Former P5 colony                               | 0.000       | 0.570       | 1.000       | 0.490            | 3,590    |
| Oil endowment                                  | 0.000       | 2.050       | 8.890       | 2.260            | 3,241    |
| Emergency ODA (residuals)                      | -2.160      | -0.040      | 14.400      | 1.570            | 1,811    |
| UNGA voting with the US                        | 0.000       | 0.350       | 0.950       | 0.150            | 3,383    |
| Conflict                                       | 0.000       | 0.150       | 1.000       | 0.360            | 3,590    |
| Drought                                        | 0.000       | 0.080       | 1.000       | 0.260            | 3,590    |
| Extreme temperature and co-occurring disasters | 0.000       | 0.110       | 1.000       | 0.310            | 3,590    |
| Flood                                          | 0.000       | 0.400       | 1.000       | 0.490            | 3,590    |
| Storm                                          | 0.000       | 0.220       | 1.000       | 0.410            | 3,590    |
| GDP per capita in PPP (log)                    | 6.150       | 8.830       | 11.400      | 1.210            | 3,397    |
| Trade in % of GDP                              | 0.000       | 72.060      | 434.000     | 38.970           | 3,348    |
| Infant mortality                               | 2.600       | 45.550      | 216.800     | 43.640           | 3,511    |
| Corruption perception index                    | 1.000       | 17.110      | 91.000      | 20.740           | 3,362    |
| Population density (log)                       | -2.920      | 4.800       | 9.620       | 1.580            | 1,299    |
| Temporary UNSC membership                      | 1.000       | 1.070       | 2.000       | 0.250            | 3,590    |
| IMF assistance                                 | 0.000       | 0.090       | 1.000       | 0.280            | 3,093    |
| US sanctions                                   | 0.000       | 0.160       | 1.000       | 0.370            | 3,590    |
| Ideological distance from the US               | 0.000       | 2.740       | 4.810       | 1.020            | 3,590    |

Notes: These variables are either included in the tables in the paper or the robustness checks in this Appendix. Listed in the order they occur.

## Robustness checks

**Table S4.** Tobit regression analysis of UN aid, including GDP per capita. Constant included but not reported. *p*-values in parentheses, estimated on the basis of heteroscedasticity-robust (Huber-White) standard errors, clustered at the level of countries. \* *p*<.05, \*\* *p*<.01.

|                                                | Immediate short-run disaster aid through CERF (log) | Long-run disaster reconstruction aid through CBPF (log) | Other bilateral and multilateral funds coordinated by the UN (log) |
|------------------------------------------------|-----------------------------------------------------|---------------------------------------------------------|--------------------------------------------------------------------|
| <b>Needs-related factors</b>                   |                                                     |                                                         |                                                                    |
| Hazard severity                                | 0.001<br>(0.173)                                    | 0.013***<br>(0.001)                                     | 0.002**<br>(0.003)                                                 |
| Total affected persons (log)                   | 0.003**<br>(0.002)                                  | 0.034*<br>(0.016)                                       | -0.001<br>(0.783)                                                  |
| State fragility index                          | 0.001***<br>(0.001)                                 | 0.030***<br>(0.000)                                     | 0.006**<br>(0.003)                                                 |
| GDP per capita in PPP (log)                    | -0.018*<br>(0.013)                                  | 0.038<br>(0.662)                                        | -0.024<br>(0.360)                                                  |
| <b>Strategic factors</b>                       |                                                     |                                                         |                                                                    |
| PTAs signed                                    | -0.001<br>(0.821)                                   | -0.105<br>(0.391)                                       | -0.016<br>(0.634)                                                  |
| Former P5 colony                               | -0.009<br>(0.353)                                   | -0.133<br>(0.409)                                       | 0.036<br>(0.313)                                                   |
| Oil endowment                                  | -0.004<br>(0.344)                                   | -0.103<br>(0.195)                                       | -0.004<br>(0.792)                                                  |
| Emergency ODA (residuals)                      | 0.006*<br>(0.012)                                   | 0.143***<br>(0.000)                                     | 0.018***<br>(0.000)                                                |
| UNGA voting with the US                        | -0.055<br>(0.091)                                   | 2.588***<br>(0.001)                                     | 0.463*<br>(0.021)                                                  |
| <b>Controls:</b>                               |                                                     |                                                         |                                                                    |
| Conflict                                       | 0.014<br>(0.422)                                    | -0.033<br>(0.914)                                       | 0.056<br>(0.289)                                                   |
| Drought                                        | 0.090***<br>(0.000)                                 | 1.069***<br>(0.001)                                     | 0.196**<br>(0.003)                                                 |
| Extreme temperature and co-occurring disasters | 0.086***<br>(0.000)                                 | 1.052**<br>(0.004)                                      | 0.194**<br>(0.004)                                                 |
| Flood                                          | 0.007<br>(0.770)                                    | -0.254<br>(0.279)                                       | -0.008<br>(0.824)                                                  |
| Storm                                          | 0.037**<br>(0.007)                                  | 0.223<br>(0.286)                                        | 0.033<br>(0.533)                                                   |
| <i>Number of observations</i>                  | 1731                                                | 1731                                                    | 1731                                                               |
| <i>Bayesian Information Criterion</i>          | 52.927                                              | 1169.127                                                | 310.887                                                            |
| <i>Log likelihood</i>                          | 33.188                                              | -524.912                                                | -95.792                                                            |

**Table S5.** Tobit regression analysis of UN aid, including trade openness. Constant included but not reported. *p*-values in parentheses, estimated on the basis of heteroscedasticity-robust (Huber-White) standard errors, clustered at the level of countries. \* *p*<.05, \*\* *p*<.01.

|                                                | Immediate short-run disaster aid through CERF (log) | Long-run disaster reconstruction aid through CBPF (log) | Other bilateral and multilateral funds coordinated by the UN (log) |
|------------------------------------------------|-----------------------------------------------------|---------------------------------------------------------|--------------------------------------------------------------------|
| <b>Needs-related factors</b>                   |                                                     |                                                         |                                                                    |
| Hazard severity                                | 0.001<br>(0.153)                                    | 0.013**<br>(0.001)                                      | 0.002**<br>(0.003)                                                 |
| Total affected persons (log)                   | 0.003**<br>(0.003)                                  | 0.029*<br>(0.027)                                       | -0.001<br>(0.740)                                                  |
| State fragility index                          | 0.002***<br>(0.000)                                 | 0.026***<br>(0.000)                                     | 0.005**<br>(0.007)                                                 |
| Trade in % of GDP                              | -0.000<br>(0.062)                                   | -0.003<br>(0.287)                                       | -0.001*<br>(0.013)                                                 |
| <b>Strategic factors</b>                       |                                                     |                                                         |                                                                    |
| PTAs signed                                    | -0.001<br>(0.849)                                   | -0.092<br>(0.421)                                       | -0.014<br>(0.688)                                                  |
| Former P5 colony                               | -0.011<br>(0.280)                                   | -0.145<br>(0.347)                                       | 0.034<br>(0.351)                                                   |
| Oil endowment                                  | -0.010*<br>(0.015)                                  | -0.093<br>(0.164)                                       | -0.017<br>(0.292)                                                  |
| Emergency ODA (residuals)                      | 0.005*<br>(0.028)                                   | 0.143***<br>(0.000)                                     | 0.018***<br>(0.000)                                                |
| UNGA voting with the US                        | -0.070*<br>(0.045)                                  | 2.425***<br>(0.001)                                     | 0.462*<br>(0.029)                                                  |
| <b>Controls:</b>                               |                                                     |                                                         |                                                                    |
| Conflict                                       | 0.009<br>(0.615)                                    | -0.140<br>(0.654)                                       | 0.039<br>(0.500)                                                   |
| Drought                                        | 0.089***<br>(0.000)                                 | 1.029***<br>(0.001)                                     | 0.198**<br>(0.004)                                                 |
| Extreme temperature and co-occurring disasters | 0.086***<br>(0.000)                                 | 0.921**<br>(0.005)                                      | 0.190**<br>(0.006)                                                 |
| Flood                                          | 0.001<br>(0.973)                                    | -0.295<br>(0.225)                                       | -0.021<br>(0.557)                                                  |
| Storm                                          | 0.037**<br>(0.007)                                  | 0.206<br>(0.301)                                        | 0.030<br>(0.576)                                                   |
| <i>Number of observations</i>                  | 1684                                                | 1684                                                    | 1684                                                               |
| <i>Bayesian Information Criterion</i>          | 92.877                                              | 1121.545                                                | 301.454                                                            |
| <i>Log likelihood</i>                          | 12.993                                              | -501.341                                                | -91.296                                                            |

**Table S6.** Tobit regression analysis of UN aid, including infant mortality. Constant included but not reported. *p*-values in parentheses, estimated on the basis of heteroscedasticity-robust (Huber-White) standard errors, clustered at the level of countries. \* *p*<.05, \*\* *p*<.01.

|                                                | Immediate short-run disaster aid through CERF (log) | Long-run disaster reconstruction aid through CBPF (log) | Other bilateral and multilateral funds coordinated by the UN (log) |
|------------------------------------------------|-----------------------------------------------------|---------------------------------------------------------|--------------------------------------------------------------------|
| <b>Needs-related factors</b>                   |                                                     |                                                         |                                                                    |
| Hazard severity                                | 0.001<br>(0.176)                                    | 0.013***<br>(0.001)                                     | 0.002**<br>(0.002)                                                 |
| Total affected persons (log)                   | 0.003**<br>(0.002)                                  | 0.034*<br>(0.016)                                       | -0.001<br>(0.823)                                                  |
| State fragility index                          | 0.002***<br>(0.000)                                 | 0.033***<br>(0.001)                                     | 0.006**<br>(0.002)                                                 |
| Infant mortality                               | 0.000<br>(0.398)                                    | -0.003<br>(0.180)                                       | 0.000<br>(0.749)                                                   |
| <b>Strategic factors</b>                       |                                                     |                                                         |                                                                    |
| PTAs signed                                    | -0.001<br>(0.813)                                   | -0.105<br>(0.389)                                       | -0.014<br>(0.671)                                                  |
| Former P5 colony                               | -0.010<br>(0.345)                                   | -0.147<br>(0.354)                                       | 0.035<br>(0.341)                                                   |
| Oil endowment                                  | -0.009*<br>(0.038)                                  | -0.103<br>(0.155)                                       | -0.012<br>(0.426)                                                  |
| Emergency ODA (residuals)                      | 0.005*<br>(0.035)                                   | 0.153***<br>(0.000)                                     | 0.017***<br>(0.000)                                                |
| UNGA voting with the US                        | -0.067*<br>(0.049)                                  | 2.541***<br>(0.001)                                     | 0.452*<br>(0.028)                                                  |
| <b>Controls:</b>                               |                                                     |                                                         |                                                                    |
| Conflict                                       | 0.017<br>(0.310)                                    | -0.056<br>(0.856)                                       | 0.062<br>(0.242)                                                   |
| Drought                                        | 0.091***<br>(0.000)                                 | 1.063***<br>(0.001)                                     | 0.198**<br>(0.003)                                                 |
| Extreme temperature and co-occurring disasters | 0.088***<br>(0.000)                                 | 1.052**<br>(0.003)                                      | 0.195**<br>(0.004)                                                 |
| Flood                                          | 0.006<br>(0.798)                                    | -0.259<br>(0.276)                                       | -0.012<br>(0.747)                                                  |
| Storm                                          | 0.038**<br>(0.006)                                  | 0.207<br>(0.318)                                        | 0.035<br>(0.521)                                                   |
| <i>Number of observations</i>                  | 1731                                                | 1731                                                    | 1731                                                               |
| <i>Bayesian Information Criterion</i>          | 68.120                                              | 1166.611                                                | 312.119                                                            |
| <i>Log likelihood</i>                          | 25.592                                              | -523.654                                                | -96.408                                                            |

**Table S7.** Tobit regression analysis of UN aid, including corruption. Constant included but not reported. *p*-values in parentheses, estimated on the basis of heteroscedasticity-robust (Huber-White) standard errors, clustered at the level of countries. \* *p*<.05, \*\* *p*<.01.

|                                                | Immediate short-run disaster aid through CERF (log) | Long-run disaster reconstruction aid through CBPF (log) | Other bilateral and multilateral funds coordinated by the UN (log) |
|------------------------------------------------|-----------------------------------------------------|---------------------------------------------------------|--------------------------------------------------------------------|
| <b>Needs-related factors</b>                   |                                                     |                                                         |                                                                    |
| Hazard severity                                | 0.001<br>(0.163)                                    | 0.012***<br>(0.001)                                     | 0.002**<br>(0.003)                                                 |
| Total affected persons (log)                   | 0.003**<br>(0.003)                                  | 0.035*<br>(0.014)                                       | -0.001<br>(0.787)                                                  |
| State fragility index                          | 0.002***<br>(0.000)                                 | 0.032***<br>(0.000)                                     | 0.006**<br>(0.003)                                                 |
| Corruption                                     | -0.001**<br>(0.006)                                 | 0.007<br>(0.078)                                        | -0.000<br>(0.681)                                                  |
| <b>Strategic factors</b>                       |                                                     |                                                         |                                                                    |
| PTAs signed                                    | -0.005<br>(0.402)                                   | -0.061<br>(0.615)                                       | -0.017<br>(0.582)                                                  |
| Former P5 colony                               | -0.010<br>(0.348)                                   | -0.141<br>(0.388)                                       | 0.035<br>(0.340)                                                   |
| Oil endowment                                  | -0.009*<br>(0.037)                                  | -0.094<br>(0.193)                                       | -0.012<br>(0.421)                                                  |
| Emergency ODA (residuals)                      | 0.005*<br>(0.029)                                   | 0.148***<br>(0.000)                                     | 0.017***<br>(0.000)                                                |
| UNGA voting with the US                        | -0.050<br>(0.150)                                   | 2.485***<br>(0.001)                                     | 0.458*<br>(0.026)                                                  |
| <b>Controls:</b>                               |                                                     |                                                         |                                                                    |
| Conflict                                       | 0.018<br>(0.280)                                    | -0.058<br>(0.850)                                       | 0.062<br>(0.239)                                                   |
| Drought                                        | 0.092***<br>(0.000)                                 | 1.048***<br>(0.001)                                     | 0.199**<br>(0.003)                                                 |
| Extreme temperature and co-occurring disasters | 0.088***<br>(0.000)                                 | 1.059**<br>(0.004)                                      | 0.196**<br>(0.004)                                                 |
| Flood                                          | 0.005<br>(0.838)                                    | -0.249<br>(0.295)                                       | -0.013<br>(0.729)                                                  |
| Storm                                          | 0.037**<br>(0.005)                                  | 0.213<br>(0.301)                                        | 0.035<br>(0.516)                                                   |
| <i>Number of observations</i>                  | 1731                                                | 1731                                                    | 1731                                                               |
| <i>Bayesian Information Criterion</i>          | 55.698                                              | 1164.433                                                | 312.045                                                            |
| <i>Log likelihood</i>                          | 31.803                                              | -522.565                                                | -96.371                                                            |

**Table S8.** Tobit regression analysis of UN aid, including population density. Constant included but not reported. *p*-values in parentheses, estimated on the basis of heteroscedasticity-robust (Huber-White) standard errors, clustered at the level of countries. \* *p*<.05, \*\* *p*<.01.

|                                                | Immediate short-run disaster aid through CERF (log) | Long-run disaster reconstruction aid through CBPF (log) | Other bilateral and multilateral funds coordinated by the UN (log) |
|------------------------------------------------|-----------------------------------------------------|---------------------------------------------------------|--------------------------------------------------------------------|
| <b>Needs-related factors</b>                   |                                                     |                                                         |                                                                    |
| Hazard severity                                | -0.000<br>(0.384)                                   | 0.006*<br>(0.027)                                       | 0.001<br>(0.176)                                                   |
| Total affected persons (log)                   | 0.003***<br>(0.000)                                 | 0.041<br>(0.112)                                        | -0.002<br>(0.609)                                                  |
| State fragility index                          | 0.002***<br>(0.000)                                 | 0.032**<br>(0.002)                                      | 0.007**<br>(0.008)                                                 |
| Population density (log)                       | -0.006*<br>(0.012)                                  | -0.077<br>(0.136)                                       | 0.008<br>(0.416)                                                   |
| <b>Strategic factors</b>                       |                                                     |                                                         |                                                                    |
| PTAs signed                                    | 0.002<br>(0.692)                                    | -0.065<br>(0.607)                                       | 0.011<br>(0.583)                                                   |
| Former P5 colony                               | 0.001<br>(0.889)                                    | -0.121<br>(0.498)                                       | 0.025<br>(0.512)                                                   |
| Oil endowment                                  | -0.008*<br>(0.012)                                  | -0.104<br>(0.127)                                       | -0.005<br>(0.653)                                                  |
| Emergency ODA (residuals)                      | 0.005***<br>(0.000)                                 | 0.145***<br>(0.000)                                     | 0.012***<br>(0.000)                                                |
| UNGA voting with the US                        | -0.069*<br>(0.027)                                  | 2.680**<br>(0.004)                                      | 0.416<br>(0.061)                                                   |
| <b>Controls:</b>                               |                                                     |                                                         |                                                                    |
| Conflict                                       | 0.013<br>(0.318)                                    | -0.269<br>(0.307)                                       | -0.019<br>(0.594)                                                  |
| Drought                                        | -0.040*<br>(0.012)                                  | -0.626<br>(0.084)                                       | 0.032<br>(0.506)                                                   |
| Extreme temperature and co-occurring disasters | -0.021<br>(0.150)                                   | -0.341<br>(0.138)                                       | -0.008<br>(0.798)                                                  |
| Flood                                          | -0.067***<br>(0.000)                                | -1.371***<br>(0.001)                                    | -0.114*<br>(0.014)                                                 |
| Storm                                          | -0.064***<br>(0.000)                                | -1.119**<br>(0.002)                                     | -0.106*<br>(0.048)                                                 |
| <i>Number of observations</i>                  | 816                                                 | 816                                                     | 816                                                                |
| <i>Bayesian Information Criterion</i>          | -241.589                                            | 680.973                                                 | 178.677                                                            |
| <i>Log likelihood</i>                          | 174.430                                             | -286.851                                                | -35.703                                                            |

**Table S9.** Tobit regression analysis of UN aid, controlling for a product term between total affected persons and hazard severity. Constant included but not reported.  $p$ -values in parentheses, estimated on the basis of heteroscedasticity-robust (Huber-White) standard errors, clustered at the level of countries. \*  $p < .05$ , \*\*  $p < .01$ .

|                                                | Immediate short-run disaster aid through CERF (log) | Long-run disaster reconstruction aid through CBPF (log) | Other bilateral and multilateral funds coordinated by the UN (log) |
|------------------------------------------------|-----------------------------------------------------|---------------------------------------------------------|--------------------------------------------------------------------|
| <b>Needs-related factors</b>                   |                                                     |                                                         |                                                                    |
| Hazard severity                                | 0.000<br>(0.253)                                    | 0.012**<br>(0.001)                                      | 0.002**<br>(0.003)                                                 |
| Total affected persons (log)                   | 0.000<br>(0.660)                                    | 0.021<br>(0.238)                                        | -0.004<br>(0.177)                                                  |
| Total affected persons (log) * hazard severity | 0.000<br>(0.062)                                    | 0.000<br>(0.331)                                        | 0.000<br>(0.141)                                                   |
| State fragility index                          | 0.002***<br>(0.000)                                 | 0.029***<br>(0.000)                                     | 0.007**<br>(0.003)                                                 |
| <b>Strategic factors</b>                       |                                                     |                                                         |                                                                    |
| PTAs signed                                    | -0.001<br>(0.825)                                   | -0.101<br>(0.408)                                       | -0.011<br>(0.729)                                                  |
| Former P5 colony                               | -0.010<br>(0.330)                                   | -0.128<br>(0.428)                                       | 0.035<br>(0.353)                                                   |
| Oil endowment                                  | -0.010*<br>(0.025)                                  | -0.094<br>(0.190)                                       | -0.013<br>(0.392)                                                  |
| Emergency ODA (residuals)                      | 0.006*<br>(0.021)                                   | 0.144***<br>(0.000)                                     | 0.018***<br>(0.000)                                                |
| UNGA voting with the US                        | -0.069*<br>(0.043)                                  | 2.622***<br>(0.001)                                     | 0.456*<br>(0.026)                                                  |
| <b>Controls:</b>                               |                                                     |                                                         |                                                                    |
| Conflict                                       | 0.017<br>(0.329)                                    | -0.039<br>(0.898)                                       | 0.061<br>(0.244)                                                   |
| Drought                                        | 0.099***<br>(0.000)                                 | 1.116***<br>(0.001)                                     | 0.211**<br>(0.002)                                                 |
| Extreme temperature and co-occurring disasters | 0.093***<br>(0.000)                                 | 1.070**<br>(0.003)                                      | 0.202**<br>(0.003)                                                 |
| Flood                                          | 0.008<br>(0.729)                                    | -0.242<br>(0.306)                                       | -0.009<br>(0.802)                                                  |
| Storm                                          | 0.044**<br>(0.002)                                  | 0.257<br>(0.226)                                        | 0.043<br>(0.438)                                                   |
| <i>Number of observations</i>                  | 1731                                                | 1731                                                    | 1731                                                               |
| <i>Bayesian Information Criterion</i>          | 56.273                                              | 1168.149                                                | 310.242                                                            |
| <i>Log likelihood</i>                          | 31.515                                              | -524.423                                                | -95.469                                                            |



**Table S10.** Tobit regression analysis of CERF aid, entering strategic factors separately. Constant included but not reported. *p*-values in parentheses, estimated on the basis of heteroscedasticity-robust (Huber-White) standard errors, clustered at the level of countries. \* *p*<.05, \*\* *p*<.01.

|                                       | Model 1             | Model 2             | Model 3             | Model 4             | Model 5             | Model 6             |
|---------------------------------------|---------------------|---------------------|---------------------|---------------------|---------------------|---------------------|
| <b>Needs-related factors</b>          |                     |                     |                     |                     |                     |                     |
| Hazard severity                       | 0.001<br>(0.192)    | 0.001<br>(0.187)    | 0.001<br>(0.192)    | 0.001<br>(0.195)    | 0.001<br>(0.188)    | 0.001<br>(0.175)    |
| Total affected persons (log)          | 0.003**<br>(0.007)  | 0.003**<br>(0.005)  | 0.003**<br>(0.002)  | 0.002*<br>(0.011)   | 0.003**<br>(0.009)  | 0.003**<br>(0.002)  |
| State fragility index                 | 0.002***<br>(0.000) | 0.002***<br>(0.000) | 0.002***<br>(0.000) | 0.002***<br>(0.000) | 0.002***<br>(0.000) | 0.002***<br>(0.000) |
| <b>Strategic factors</b>              |                     |                     |                     |                     |                     |                     |
| PTAs signed                           | -0.005<br>(0.360)   |                     |                     |                     |                     | -0.002<br>(0.776)   |
| Former P5 colony                      |                     | -0.008<br>(0.497)   |                     |                     |                     | -0.010<br>(0.318)   |
| Oil endowment                         |                     |                     | -0.010*<br>(0.025)  |                     |                     | -0.009*<br>(0.029)  |
| Emergency ODA (residuals)             |                     |                     |                     | 0.006*<br>(0.024)   |                     | 0.006*<br>(0.020)   |
| UNGA voting with the US               |                     |                     |                     |                     | -0.069*<br>(0.045)  | -0.072*<br>(0.037)  |
| <b>Controls</b>                       |                     |                     |                     |                     |                     |                     |
| Conflict                              | 0.009<br>(0.614)    | 0.010<br>(0.550)    | 0.019<br>(0.280)    | 0.001<br>(0.959)    | 0.007<br>(0.667)    | 0.017<br>(0.310)    |
| Drought                               | 0.099***<br>(0.000) | 0.099***<br>(0.000) | 0.091***<br>(0.000) | 0.098***<br>(0.000) | 0.101***<br>(0.000) | 0.090***<br>(0.000) |
| Extreme temperature and co-occurring  | 0.099***<br>(0.000) | 0.099***<br>(0.000) | 0.093***<br>(0.000) | 0.095***<br>(0.000) | 0.101***<br>(0.000) | 0.088***<br>(0.000) |
| Flood                                 | 0.011<br>(0.637)    | 0.011<br>(0.651)    | 0.008<br>(0.746)    | 0.012<br>(0.599)    | 0.011<br>(0.632)    | 0.006<br>(0.797)    |
| Storm                                 | 0.039**<br>(0.004)  | 0.039**<br>(0.004)  | 0.036**<br>(0.005)  | 0.040**<br>(0.004)  | 0.039**<br>(0.005)  | 0.037**<br>(0.006)  |
| <i>Number of observations</i>         | 1731                | 1731                | 1731                | 1731                | 1731                | 1731                |
| <i>Bayesian Information Criterion</i> | 82.647              | 83.004              | 56.033              | 68.847              | 77.912              | 62.026              |
| <i>Log likelihood</i>                 | -0.313              | -0.491              | 12.994              | 6.587               | 2.055               | 24.910              |

**Table S11.** Tobit regression analysis of CBPF aid, entering strategic factors separately. Constant included but not reported. *p*-values in parentheses, estimated on the basis of heteroscedasticity-robust (Huber-White) standard errors, clustered at the level of countries. \* *p*<.05, \*\* *p*<.01.

|                                                | <b>Model 1</b>      | <b>Model 2</b>      | <b>Model 3</b>      | <b>Model 4</b>      | <b>Model 5</b>      | <b>Model 6</b>      |
|------------------------------------------------|---------------------|---------------------|---------------------|---------------------|---------------------|---------------------|
| <b>Needs-related factors</b>                   |                     |                     |                     |                     |                     |                     |
| Hazard severity                                | 0.013***<br>(0.000) | 0.013***<br>(0.001) | 0.013***<br>(0.000) | 0.013**<br>(0.001)  | 0.013***<br>(0.000) | 0.012***<br>(0.001) |
| Total affected persons (log)                   | 0.034*<br>(0.025)   | 0.035*<br>(0.021)   | 0.036*<br>(0.013)   | 0.030*<br>(0.039)   | 0.036*<br>(0.017)   | 0.033*<br>(0.017)   |
| State fragility index                          | 0.032***<br>(0.001) | 0.034***<br>(0.000) | 0.030***<br>(0.001) | 0.029***<br>(0.000) | 0.036***<br>(0.000) | 0.029***<br>(0.000) |
| <b>Strategic factors</b>                       |                     |                     |                     |                     |                     |                     |
| PTAs signed                                    | -0.183<br>(0.196)   |                     |                     |                     |                     | -0.105<br>(0.392)   |
| Former P5 colony                               |                     | -0.050<br>(0.775)   |                     |                     |                     | -0.130<br>(0.423)   |
| Oil endowment                                  |                     |                     | -0.121<br>(0.121)   |                     |                     | -0.092<br>(0.199)   |
| Emergency ODA (residuals)                      |                     |                     |                     | 0.139***<br>(0.001) |                     | 0.144***<br>(0.000) |
| UNGA voting with the US                        |                     |                     |                     |                     | 2.840***<br>(0.000) | 2.610***<br>(0.001) |
| <b>Controls:</b>                               |                     |                     |                     |                     |                     |                     |
| Conflict                                       | 0.009<br>(0.978)    | -0.011<br>(0.971)   | 0.117<br>(0.723)    | -0.184<br>(0.503)   | -0.049<br>(0.870)   | -0.040<br>(0.894)   |
| Drought                                        | 1.261**<br>(0.001)  | 1.261**<br>(0.002)  | 1.156***<br>(0.001) | 1.213**<br>(0.001)  | 1.231**<br>(0.002)  | 1.070***<br>(0.001) |
| Extreme temperature and co-occurring disasters | 1.350**<br>(0.002)  | 1.357**<br>(0.002)  | 1.278**<br>(0.001)  | 1.202**<br>(0.003)  | 1.307**<br>(0.002)  | 1.050**<br>(0.004)  |
| Flood                                          | -0.247<br>(0.316)   | -0.249<br>(0.307)   | -0.264<br>(0.280)   | -0.198<br>(0.413)   | -0.260<br>(0.296)   | -0.248<br>(0.292)   |
| Storm                                          | 0.242<br>(0.283)    | 0.235<br>(0.296)    | 0.209<br>(0.327)    | 0.265<br>(0.226)    | 0.223<br>(0.320)    | 0.224<br>(0.281)    |
| <i>Number of observations</i>                  | 1731                | 1731                | 1731                | 1731                | 1731                | 1731                |
| <i>Bayesian Information Criterion</i>          | 1212.889            | 1217.610            | 1205.523            | 1181.196            | 1184.395            | 1161.896            |
| <i>Log likelihood</i>                          | -565.434            | -567.795            | -561.751            | -549.588            | -551.187            | -525.025            |

**Table S12.** Tobit regression analysis of other bilateral and multilateral aid, entering strategic factors separately. Constant included but not reported.  $p$ -values in parentheses, estimated on the basis of heteroscedasticity-robust (Huber-White) standard errors, clustered at the level of countries. \*  $p < .05$ , \*\*  $p < .01$ .

|                                                | Model 1  | Model 2  | Model 3  | Model 4  | Model 5  | Model 6  |
|------------------------------------------------|----------|----------|----------|----------|----------|----------|
| <b>Needs-related factors</b>                   |          |          |          |          |          |          |
| Hazard severity                                | 0.002**  | 0.002**  | 0.002**  | 0.002**  | 0.002**  | 0.002**  |
|                                                | (0.001)  | (0.003)  | (0.001)  | (0.003)  | (0.001)  | (0.003)  |
| Total affected persons (log)                   | 0.001    | 0.001    | 0.001    | 0.000    | 0.001    | -0.000   |
|                                                | (0.625)  | (0.708)  | (0.671)  | (0.933)  | (0.667)  | (0.835)  |
| State fragility index                          | 0.008**  | 0.008*** | 0.007*** | 0.006**  | 0.008*** | 0.006**  |
|                                                | (0.002)  | (0.001)  | (0.001)  | (0.005)  | (0.000)  | (0.003)  |
| <b>Strategic factors</b>                       |          |          |          |          |          |          |
| PTAs signed                                    | -0.032   |          |          |          |          | -0.014   |
|                                                | (0.364)  |          |          |          |          | (0.678)  |
| Former P5 colony                               |          | 0.050    |          |          |          | 0.035    |
|                                                |          | (0.196)  |          |          |          | (0.350)  |
| Oil endowment                                  |          |          | -0.017   |          |          | -0.012   |
|                                                |          |          | (0.309)  |          |          | (0.417)  |
| Emergency ODA (residuals)                      |          |          |          | 0.019*** |          | 0.018*** |
|                                                |          |          |          | (0.000)  |          | (0.000)  |
| UNGA voting with the US                        |          |          |          |          | 0.477*   | 0.450*   |
|                                                |          |          |          |          | (0.016)  | (0.027)  |
| <b>Controls:</b>                               |          |          |          |          |          |          |
| Conflict                                       | 0.086    | 0.062    | 0.100    | 0.058    | 0.081    | 0.061    |
|                                                | (0.108)  | (0.196)  | (0.077)  | (0.252)  | (0.103)  | (0.244)  |
| Drought                                        | 0.218**  | 0.218**  | 0.197**  | 0.213**  | 0.214**  | 0.197**  |
|                                                | (0.009)  | (0.009)  | (0.007)  | (0.009)  | (0.010)  | (0.003)  |
| Extreme temperature and co-occurring disasters | 0.248**  | 0.247**  | 0.230**  | 0.222**  | 0.234**  | 0.196**  |
|                                                | (0.004)  | (0.003)  | (0.002)  | (0.009)  | (0.003)  | (0.004)  |
| Flood                                          | -0.015   | -0.013   | -0.015   | -0.008   | -0.020   | -0.013   |
|                                                | (0.730)  | (0.762)  | (0.711)  | (0.850)  | (0.613)  | (0.725)  |
| Storm                                          | 0.035    | 0.034    | 0.030    | 0.040    | 0.030    | 0.035    |
|                                                | (0.510)  | (0.531)  | (0.564)  | (0.504)  | (0.585)  | (0.525)  |
| <i>Number of observations</i>                  | 1731     | 1731     | 1731     | 1731     | 1731     | 1731     |
| <i>Bayesian Information Criterion</i>          | 316.256  | 315.342  | 314.834  | 297.767  | 301.250  | 304.797  |
| <i>Log likelihood</i>                          | -117.118 | -116.661 | -116.406 | -107.873 | -109.615 | -96.475  |

**Table S13.** Tobit regression analysis of UN aid, controlling for temporary membership in the UN Security Council. Constant included but not reported. *p*-values in parentheses, estimated on the basis of heteroscedasticity-robust (Huber-White) standard errors, clustered at the level of countries. \* *p*<.05, \*\* *p*<.01.

|                                                | Immediate short-run disaster aid through CERF (log) | Long-run disaster reconstruction aid through CBPF (log) | Other bilateral and multilateral funds coordinated by the UN (log) |
|------------------------------------------------|-----------------------------------------------------|---------------------------------------------------------|--------------------------------------------------------------------|
| <b>Needs-related factors</b>                   |                                                     |                                                         |                                                                    |
| Hazard severity                                | 0.001<br>(0.172)                                    | 0.013***<br>(0.001)                                     | 0.002**<br>(0.002)                                                 |
| Total affected persons (log)                   | 0.003**<br>(0.002)                                  | 0.035*<br>(0.017)                                       | -0.000<br>(0.948)                                                  |
| State fragility index                          | 0.002***<br>(0.000)                                 | 0.030***<br>(0.000)                                     | 0.007**<br>(0.002)                                                 |
| <b>Strategic factors</b>                       |                                                     |                                                         |                                                                    |
| PTAs signed                                    | -0.002<br>(0.715)                                   | -0.105<br>(0.392)                                       | -0.015<br>(0.667)                                                  |
| Former P5 colony                               | -0.010<br>(0.333)                                   | -0.123<br>(0.451)                                       | 0.037<br>(0.326)                                                   |
| Oil endowment                                  | -0.010*<br>(0.027)                                  | -0.101<br>(0.175)                                       | -0.017<br>(0.318)                                                  |
| Emergency ODA (residuals)                      | 0.006*<br>(0.020)                                   | 0.145***<br>(0.000)                                     | 0.018***<br>(0.000)                                                |
| UNGA voting with the US                        | -0.072*<br>(0.035)                                  | 2.601***<br>(0.001)                                     | 0.426*<br>(0.034)                                                  |
| Temporary UNSC membership                      | 0.021<br>(0.191)                                    | 0.341<br>(0.209)                                        | 0.112*<br>(0.027)                                                  |
| <b>Controls:</b>                               |                                                     |                                                         |                                                                    |
| Conflict                                       | 0.017<br>(0.318)                                    | -0.067<br>(0.823)                                       | 0.054<br>(0.304)                                                   |
| Drought                                        | 0.091***<br>(0.000)                                 | 1.077***<br>(0.001)                                     | 0.205**<br>(0.001)                                                 |
| Extreme temperature and co-occurring disasters | 0.088***<br>(0.000)                                 | 1.056**<br>(0.004)                                      | 0.203**<br>(0.003)                                                 |
| Flood                                          | 0.006<br>(0.797)                                    | -0.246<br>(0.300)                                       | -0.007<br>(0.845)                                                  |
| Storm                                          | 0.038**<br>(0.005)                                  | 0.232<br>(0.270)                                        | 0.047<br>(0.379)                                                   |
| <i>Number of observations</i>                  | 1731                                                | 1731                                                    | 1731                                                               |
| <i>Bayesian Information Criterion</i>          | 66.314                                              | 1166.537                                                | 305.964                                                            |
| <i>Log likelihood</i>                          | 26.494                                              | -523.617                                                | -93.330                                                            |

**Table S14.** Tobit regression analysis of UN aid, controlling for IMF assistance in a recipient country. Constant included but not reported. *p*-values in parentheses, estimated on the basis of heteroscedasticity-robust (Huber-White) standard errors, clustered at the level of countries. \* *p*<.05, \*\* *p*<.01.

|                                                | Immediate short-run disaster aid through CERF (log) | Long-run disaster reconstruction aid through CBPF (log) | Other bilateral and multilateral funds coordinated by the UN (log) |
|------------------------------------------------|-----------------------------------------------------|---------------------------------------------------------|--------------------------------------------------------------------|
| <b>Needs-related factors</b>                   |                                                     |                                                         |                                                                    |
| Hazard severity                                | 0.001<br>(0.208)                                    | 0.014***<br>(0.000)                                     | 0.002**<br>(0.006)                                                 |
| Total affected persons (log)                   | 0.003**<br>(0.004)                                  | 0.029<br>(0.074)                                        | -0.001<br>(0.636)                                                  |
| State fragility index                          | 0.002***<br>(0.000)                                 | 0.032***<br>(0.000)                                     | 0.006**<br>(0.006)                                                 |
| <b>Strategic factors</b>                       |                                                     |                                                         |                                                                    |
| PTAs signed                                    | -0.004<br>(0.555)                                   | -0.156<br>(0.294)                                       | -0.007<br>(0.770)                                                  |
| Former P5 colony                               | -0.010<br>(0.355)                                   | -0.139<br>(0.442)                                       | 0.029<br>(0.381)                                                   |
| Oil endowment                                  | -0.009*<br>(0.046)                                  | -0.089<br>(0.241)                                       | -0.008<br>(0.514)                                                  |
| Emergency ODA (residuals)                      | 0.005*<br>(0.032)                                   | 0.144***<br>(0.000)                                     | 0.013***<br>(0.000)                                                |
| UNGA voting with the US                        | -0.076<br>(0.065)                                   | 3.307***<br>(0.001)                                     | 0.461*<br>(0.029)                                                  |
| IMF assistance                                 | 0.010<br>(0.448)                                    | 0.036<br>(0.856)                                        | 0.035<br>(0.292)                                                   |
| <b>Controls:</b>                               |                                                     |                                                         |                                                                    |
| Conflict                                       | 0.019<br>(0.310)                                    | 0.036<br>(0.912)                                        | 0.038<br>(0.386)                                                   |
| Drought                                        | 0.087***<br>(0.000)                                 | 1.120**<br>(0.001)                                      | 0.162**<br>(0.004)                                                 |
| Extreme temperature and co-occurring disasters | 0.085***<br>(0.000)                                 | 1.052**<br>(0.009)                                      | 0.137**<br>(0.006)                                                 |
| Flood                                          | 0.008<br>(0.762)                                    | -0.236<br>(0.354)                                       | -0.000<br>(0.997)                                                  |
| Storm                                          | 0.042**<br>(0.005)                                  | 0.254<br>(0.306)                                        | 0.038<br>(0.383)                                                   |
| <i>Number of observations</i>                  | 1448                                                | 1448                                                    | 1448                                                               |
| <i>Bayesian Information Criterion</i>          | 61.519                                              | 1030.336                                                | 248.073                                                            |
| <i>Log likelihood</i>                          | 27.464                                              | -456.944                                                | -65.813                                                            |

**Table S15.** Tobit regression analysis of UN aid, controlling for US sanctions. Constant included but not reported. *p*-values in parentheses, estimated on the basis of heteroscedasticity-robust (Huber-White) standard errors, clustered at the level of countries. \* *p*<.05, \*\* *p*<.01.

|                                                | Immediate short-run disaster aid through CERF (log) | Long-run disaster reconstruction aid through CBPF (log) | Other bilateral and multilateral funds coordinated by the UN (log) |
|------------------------------------------------|-----------------------------------------------------|---------------------------------------------------------|--------------------------------------------------------------------|
| <b>Needs-related factors</b>                   |                                                     |                                                         |                                                                    |
| Hazard severity                                | 0.001<br>(0.168)                                    | 0.012***<br>(0.001)                                     | 0.002**<br>(0.003)                                                 |
| Total affected persons (log)                   | 0.003**<br>(0.002)                                  | 0.033*<br>(0.017)                                       | -0.000<br>(0.846)                                                  |
| State fragility index                          | 0.002***<br>(0.000)                                 | 0.029***<br>(0.000)                                     | 0.006**<br>(0.004)                                                 |
| <b>Strategic factors</b>                       |                                                     |                                                         |                                                                    |
| PTAs signed                                    | -0.002<br>(0.772)                                   | -0.104<br>(0.397)                                       | -0.014<br>(0.673)                                                  |
| Former P5 colony                               | -0.011<br>(0.291)                                   | -0.126<br>(0.429)                                       | 0.036<br>(0.334)                                                   |
| Oil endowment                                  | -0.009*<br>(0.021)                                  | -0.091<br>(0.198)                                       | -0.012<br>(0.451)                                                  |
| Emergency ODA (residuals)                      | 0.006*<br>(0.021)                                   | 0.144***<br>(0.000)                                     | 0.018***<br>(0.000)                                                |
| UNGA voting with the US                        | -0.070*<br>(0.050)                                  | 2.591***<br>(0.001)                                     | 0.440*<br>(0.032)                                                  |
| US sanctions                                   | 0.004<br>(0.758)                                    | -0.035<br>(0.833)                                       | -0.019<br>(0.622)                                                  |
| <b>Controls:</b>                               |                                                     |                                                         |                                                                    |
| Conflict                                       | 0.018<br>(0.259)                                    | -0.046<br>(0.878)                                       | 0.058<br>(0.273)                                                   |
| Drought                                        | 0.090***<br>(0.000)                                 | 1.070***<br>(0.001)                                     | 0.197**<br>(0.002)                                                 |
| Extreme temperature and co-occurring disasters | 0.088***<br>(0.000)                                 | 1.047**<br>(0.004)                                      | 0.195**<br>(0.004)                                                 |
| Flood                                          | 0.006<br>(0.803)                                    | -0.247<br>(0.296)                                       | -0.012<br>(0.759)                                                  |
| Storm                                          | 0.037**<br>(0.006)                                  | 0.223<br>(0.282)                                        | 0.034<br>(0.529)                                                   |
| <i>Number of observations</i>                  | 1731                                                | 1731                                                    | 1731                                                               |
| <i>Bayesian Information Criterion</i>          | 69.243                                              | 1169.296                                                | 312.000                                                            |
| <i>Log likelihood</i>                          | 25.030                                              | -524.996                                                | -96.348                                                            |

**Table S16.** Tobit regression analysis of UN aid, including a temporal trend variable. Constant included but not reported.  $p$ -values in parentheses, estimated on the basis of heteroscedasticity-robust (Huber-White) standard errors, clustered at the level of countries. \*  $p < .05$ , \*\*  $p < .01$ .

|                                                | Immediate short-run disaster aid through CERF (log) | Long-run disaster reconstruction aid through CBPF (log) | Other bilateral and multilateral funds coordinated by the UN (log) |
|------------------------------------------------|-----------------------------------------------------|---------------------------------------------------------|--------------------------------------------------------------------|
| <b>Needs-related factors</b>                   |                                                     |                                                         |                                                                    |
| Hazard severity                                | 0.001<br>(0.146)                                    | 0.012***<br>(0.001)                                     | 0.002**<br>(0.002)                                                 |
| Total affected persons (log)                   | 0.003**<br>(0.003)                                  | 0.035*<br>(0.013)                                       | -0.000<br>(0.884)                                                  |
| State fragility index                          | 0.002***<br>(0.000)                                 | 0.029***<br>(0.000)                                     | 0.006**<br>(0.003)                                                 |
| <b>Strategic factors</b>                       |                                                     |                                                         |                                                                    |
| PTAs signed                                    | -0.006<br>(0.354)                                   | -0.052<br>(0.663)                                       | -0.010<br>(0.751)                                                  |
| Former P5 colony                               | -0.009<br>(0.380)                                   | -0.156<br>(0.338)                                       | 0.033<br>(0.361)                                                   |
| Oil endowment                                  | -0.009*<br>(0.040)                                  | -0.098<br>(0.175)                                       | -0.013<br>(0.401)                                                  |
| Emergency ODA (residuals)                      | 0.005*<br>(0.031)                                   | 0.151***<br>(0.000)                                     | 0.018***<br>(0.000)                                                |
| UNGA voting with the US                        | -0.024<br>(0.529)                                   | 2.242**<br>(0.003)                                      | 0.427*<br>(0.040)                                                  |
| <b>Controls:</b>                               |                                                     |                                                         |                                                                    |
| Conflict                                       | 0.018<br>(0.291)                                    | -0.042<br>(0.894)                                       | 0.061<br>(0.243)                                                   |
| Drought                                        | 0.092***<br>(0.000)                                 | 1.051***<br>(0.001)                                     | 0.195**<br>(0.002)                                                 |
| Extreme temperature and co-occurring disasters | 0.087***<br>(0.000)                                 | 1.062**<br>(0.003)                                      | 0.196**<br>(0.004)                                                 |
| Flood                                          | 0.003<br>(0.890)                                    | -0.241<br>(0.313)                                       | -0.013<br>(0.727)                                                  |
| Storm                                          | 0.038**<br>(0.005)                                  | 0.196<br>(0.332)                                        | 0.033<br>(0.548)                                                   |
| Trend                                          | 0.004***<br>(0.001)                                 | -0.045*<br>(0.013)                                      | -0.003<br>(0.562)                                                  |
| <i>Number of observations</i>                  | 1731                                                | 1731                                                    | 1731                                                               |
| <i>Bayesian Information Criterion</i>          | 53.702                                              | 1162.229                                                | 311.878                                                            |
| <i>Log likelihood</i>                          | 32.801                                              | -521.463                                                | -96.287                                                            |

**Table S17.** Cross-sectional logistic regression analysis of receiving UN aid (=1). Constant included but not reported. *p*-values in parentheses, estimated on the basis of heteroscedasticity-robust (Huber-White) standard errors, clustered at the level of countries. \* *p*<.05, \*\* *p*<.01.

|                                                | Immediate short-run disaster aid through CERF (log) | Long-run disaster reconstruction aid through CBPF (log) | Other bilateral and multilateral funds coordinated by the UN (log) |
|------------------------------------------------|-----------------------------------------------------|---------------------------------------------------------|--------------------------------------------------------------------|
| <b>Needs-related factors</b>                   |                                                     |                                                         |                                                                    |
| Hazard severity                                | 0.018***<br>(0.000)                                 | 0.027***<br>(0.000)                                     | 0.028***<br>(0.000)                                                |
| Total affected persons (log)                   | 0.049**<br>(0.003)                                  | 0.039<br>(0.065)                                        | 0.002<br>(0.948)                                                   |
| State fragility index                          | 0.043***<br>(0.000)                                 | 0.043***<br>(0.000)                                     | 0.072***<br>(0.000)                                                |
| <b>Strategic factors</b>                       |                                                     |                                                         |                                                                    |
| PTAs signed                                    | -0.095<br>(0.346)                                   | -0.336*<br>(0.043)                                      | -0.263<br>(0.324)                                                  |
| Former P5 colony                               | -0.122<br>(0.402)                                   | -0.011<br>(0.953)                                       | 0.254<br>(0.433)                                                   |
| Oil endowment                                  | -0.263***<br>(0.000)                                | -0.150*<br>(0.012)                                      | -0.044<br>(0.668)                                                  |
| Emergency ODA (residuals)                      | 0.070<br>(0.097)                                    | 0.133**<br>(0.006)                                      | 0.271***<br>(0.000)                                                |
| UNGA voting with the US                        | -1.962**<br>(0.002)                                 | 4.580***<br>(0.000)                                     | 5.459***<br>(0.000)                                                |
| <b>Controls:</b>                               |                                                     |                                                         |                                                                    |
| Conflict                                       | 0.290<br>(0.154)                                    | -0.308<br>(0.259)                                       | 0.438<br>(0.212)                                                   |
| Drought                                        | 2.169***<br>(0.000)                                 | 1.864***<br>(0.000)                                     | 2.174***<br>(0.001)                                                |
| Extreme temperature and co-occurring disasters | 2.478***<br>(0.000)                                 | 1.727***<br>(0.000)                                     | 2.393***<br>(0.000)                                                |
| Flood                                          | 0.190<br>(0.605)                                    | -0.570<br>(0.222)                                       | -0.251<br>(0.736)                                                  |
| Storm                                          | 1.085***<br>(0.000)                                 | 0.455<br>(0.264)                                        | 0.322<br>(0.694)                                                   |
| <i>Number of observations</i>                  | 1731                                                | 1731                                                    | 1731                                                               |
| <i>Bayesian Information Criterion</i>          | 1512.928                                            | 1016.292                                                | 494.637                                                            |
| <i>Log likelihood</i>                          | -704.269                                            | -455.951                                                | -195.123                                                           |



**Table S18.** Time-series cross-sectional logistic regression analysis of receiving UN aid (=1) with fixed effects. Constant included but not reported. *p*-values in parentheses, estimated on the basis of heteroscedasticity-robust (Huber-White) standard errors, clustered at the level of countries. \* *p*<.05, \*\* *p*<.01.

|                                                | Immediate short-run disaster aid through CERF (log) | Long-run disaster reconstruction aid through CBPF (log) | Other bilateral and multilateral funds coordinated by the UN (log) |
|------------------------------------------------|-----------------------------------------------------|---------------------------------------------------------|--------------------------------------------------------------------|
| <b>Needs-related factors</b>                   |                                                     |                                                         |                                                                    |
| Hazard severity                                | 0.020***<br>(0.000)                                 | 0.023***<br>(0.000)                                     | 0.026**<br>(0.002)                                                 |
| Total affected persons (log)                   | 0.044*<br>(0.010)                                   | 0.035<br>(0.108)                                        | -0.014<br>(0.674)                                                  |
| State fragility index                          | 0.047***<br>(0.000)                                 | 0.038***<br>(0.000)                                     | 0.062***<br>(0.000)                                                |
| <b>Strategic factors</b>                       |                                                     |                                                         |                                                                    |
| PTAs signed                                    | -0.218<br>(0.059)                                   | -0.243<br>(0.207)                                       | -0.194<br>(0.598)                                                  |
| Former P5 colony                               | -0.079<br>(0.598)                                   | -0.152<br>(0.428)                                       | 0.258<br>(0.452)                                                   |
| Oil endowment                                  | -0.241***<br>(0.000)                                | -0.198**<br>(0.002)                                     | -0.133<br>(0.239)                                                  |
| Emergency ODA (residuals)                      | 0.065<br>(0.138)                                    | 0.168**<br>(0.003)                                      | 0.303***<br>(0.000)                                                |
| UNGA voting with the US                        | -0.502<br>(0.636)                                   | 0.442<br>(0.740)                                        | -0.057<br>(0.982)                                                  |
| <b>Controls:</b>                               |                                                     |                                                         |                                                                    |
| Conflict                                       | 0.286<br>(0.170)                                    | -0.198<br>(0.497)                                       | 0.676<br>(0.084)                                                   |
| Drought                                        | 2.209***<br>(0.000)                                 | 1.823***<br>(0.000)                                     | 2.212**<br>(0.002)                                                 |
| Extreme temperature and co-occurring disasters | 2.467***<br>(0.000)                                 | 1.778***<br>(0.000)                                     | 2.327***<br>(0.001)                                                |
| Flood                                          | 0.103<br>(0.785)                                    | -0.348<br>(0.471)                                       | 0.006<br>(0.994)                                                   |
| Storm                                          | 1.122***<br>(0.000)                                 | 0.527<br>(0.201)                                        | 0.215<br>(0.810)                                                   |
| <i>Number of observations</i>                  | 1731                                                | 1260                                                    | 1260                                                               |
| <i>Bayesian Information Criterion</i>          | 1378.863                                            | 859.980                                                 | 394.680                                                            |
| <i>Log likelihood</i>                          | -640.965                                            | -383.587                                                | -150.937                                                           |

**Table S19.** Tobit regression analysis of UN aid, including lags. Constant included but not reported. *p*-values in parentheses, estimated on the basis of heteroscedasticity-robust (Huber-White) standard errors, clustered at the level of countries. \* *p*<.05, \*\* *p*<.01.

|                                                | Immediate short-run disaster aid through UN CERF (log) | Long-run disaster reconstruction aid through UN CBPF (log) | Long-run disaster reconstruction aid other bilateral and multilateral funds raised by the UN (log) |
|------------------------------------------------|--------------------------------------------------------|------------------------------------------------------------|----------------------------------------------------------------------------------------------------|
| <b>Needs-related factors</b>                   |                                                        |                                                            |                                                                                                    |
| Hazard severity                                | 0.001<br>(0.239)                                       | 0.011**<br>(0.003)                                         | 0.002*<br>(0.014)                                                                                  |
| Total affected persons (log)                   | 0.002**<br>(0.007)                                     | 0.027*<br>(0.030)                                          | -0.000<br>(0.958)                                                                                  |
| State fragility index (lag 1)                  | 0.002***<br>(0.000)                                    | 0.031***<br>(0.000)                                        | 0.006**<br>(0.002)                                                                                 |
| <b>Strategic factors</b>                       |                                                        |                                                            |                                                                                                    |
| PTAs signed (lag 1)                            | 0.001<br>(0.912)                                       | -0.024<br>(0.741)                                          | -0.022<br>(0.357)                                                                                  |
| Former P5 colony                               | -0.010<br>(0.336)                                      | -0.125<br>(0.438)                                          | 0.031<br>(0.395)                                                                                   |
| Oil endowment (lag 1)                          | -0.009*<br>(0.031)                                     | -0.105<br>(0.155)                                          | -0.014<br>(0.360)                                                                                  |
| Emergency ODA (residuals) (lag 1)              | 0.006<br>(0.052)                                       | 0.134***<br>(0.001)                                        | 0.016***<br>(0.000)                                                                                |
| UNGA voting with US                            | -0.091**<br>(0.008)                                    | 2.309**<br>(0.001)                                         | 0.407*<br>(0.019)                                                                                  |
| <b>Controls:</b>                               |                                                        |                                                            |                                                                                                    |
| Conflict (lag 1)                               | 0.016<br>(0.358)                                       | -0.036<br>(0.908)                                          | 0.079<br>(0.160)                                                                                   |
| Drought                                        | 0.092***<br>(0.000)                                    | 1.147***<br>(0.000)                                        | 0.201**<br>(0.001)                                                                                 |
| Extreme temperature and co-occurring disasters | 0.093***<br>(0.000)                                    | 1.086**<br>(0.002)                                         | 0.209**<br>(0.002)                                                                                 |
| Flood                                          | 0.011<br>(0.671)                                       | -0.177<br>(0.482)                                          | 0.000<br>(0.994)                                                                                   |
| Storm                                          | 0.040**<br>(0.003)                                     | 0.226<br>(0.292)                                           | 0.032<br>(0.568)                                                                                   |
| <i>Number of observations</i>                  | 1644                                                   | 1644                                                       | 1644                                                                                               |
| <i>Bayesian Information Criterion</i>          | 51.824                                                 | 1148.720                                                   | 303.317                                                                                            |
| <i>Log likelihood</i>                          | 29.625                                                 | -518.824                                                   | -96.122                                                                                            |

**Table S20.** AUROC scores from out-of-sample cross validations.

|                              | Immediate short-run disaster aid through CERF (log) | Long-run disaster reconstruction aid through CBPF (log) | Other bilateral and multilateral funds coordinated by the UN (log) |
|------------------------------|-----------------------------------------------------|---------------------------------------------------------|--------------------------------------------------------------------|
| Baseline                     | 0.691                                               | 0.701                                                   | 0.768                                                              |
| Baseline + strategic         | 0.734                                               | 0.739                                                   | 0.806                                                              |
| Baseline + needs             | 0.759                                               | 0.760                                                   | 0.846                                                              |
| Baseline + needs + strategic | 0.773                                               | 0.785                                                   | 0.860                                                              |

*Notes:* As the main regression analysis presented is limited in its information about the degree to which groups of variables (related to needs and strategic interests, respectively) contribute to predicting UN disaster aid, we conduct a series of additional tests that directly estimate the contribution of the different groups of explanatory factors through predictive modeling. Similar to regression modeling, this prediction approach cannot be used to estimate causal effects, but it can serve to test observable implications of relevant theories (1). Models that perform well out of sample on new data can be assumed to be able to capture relevant actual processes. In contrast, estimated relations in-sample that fail to predict similar outcomes on new data could reflect overfitting or misspecification of the original model or causal processes that are unique to the study sample.

Specifically, we conducted a set of 5-fold cross-validations. To this end, we partitioned the global sample of observations into five folds of equal size and then sequentially created training samples consisting of four of the folds and a test sample containing the last, fifth, fold. As most variables are measured at the level of countries and not disasters, we cluster disaster observations by country and year in the division of test and training samples. To improve the stability of the simulations, we replaced the Tobit estimator with conventional logit using a binary dependent variable indicating whether a country experiencing disasters received aid in a given year '1' or not '0' (see also Table S16 and S17).

Using randomized draws we repeated this 5-fold cross-validation ten times, resulting in 50 out-of-sample simulations. We estimated and then predicted four models for each of the dependent variables. First, we estimate a *baseline* model with control variables only. The baseline model is then extended in different ways: a model that adds *strategic* variables, a model with *needs-related* variables, and the full combined model including *strategic+needs-related* variables (variables included mirroring analyses presented in Table 2 in the main manuscript).

The table displays the average results of these 50 cross-validations by means of area under the curve for Receiver Operating Characteristic (AUROC). AUROC measures the area under the ROC curve, which plots the true positive rate over the true negative rate and varies between 0 (no correct predictions) and 1 (all correct predictions). AUROC scores are thus high for models that correctly recall a large fraction of the positives for any given level of falsely predicted aid allocation. It is thus a metric that is the closer to 1, the better the model is at correctly distinguishing between the two outcomes no aid received and aid received.

We find that across dependent variables, the *needs* model predicts better out of sample than the *strategic* model. While the combined model performs best, the improvement over the more parsimonious *needs* model is comparatively small, especially for disaster aid going via *other bilateral and multilateral funds in the UN*. Taken together, these additional tests provide further support of our argument about the relative importance of the themes we evaluate. Specifically, they indicate that need is a better predictor for UN disaster aid allocation than strategic explanations. That said, strategic explanations matter too as the full model gets the highest score.

**Table S21.** Tobit regression analysis of UN aid, controlling for ideological distance of the recipient country from the US in the UNGA. Constant included but not reported. *p*-values in parentheses, estimated on the basis of heteroscedasticity-robust (Huber-White) standard errors, clustered at the level of countries. \* *p*<.05, \*\* *p*<.01.

|                                                | Immediate short-run disaster aid through CERF (log) | Long-run disaster reconstruction aid through CBPF (log) | Other bilateral and multilateral funds coordinated by the UN (log) |
|------------------------------------------------|-----------------------------------------------------|---------------------------------------------------------|--------------------------------------------------------------------|
| <b>Needs-related factors</b>                   |                                                     |                                                         |                                                                    |
| Hazard severity                                | 0.001<br>(0.187)                                    | 0.013***<br>(0.001)                                     | 0.002**<br>(0.004)                                                 |
| Total affected persons (log)                   | 0.003**<br>(0.002)                                  | 0.033*<br>(0.021)                                       | -0.000<br>(0.974)                                                  |
| State fragility index                          | 0.002***<br>(0.000)                                 | 0.028***<br>(0.000)                                     | 0.007**<br>(0.003)                                                 |
| <b>Strategic factors</b>                       |                                                     |                                                         |                                                                    |
| PTAs signed                                    | -0.001<br>(0.863)                                   | -0.115<br>(0.349)                                       | -0.018<br>(0.584)                                                  |
| Former P5 colony                               | -0.010<br>(0.302)                                   | -0.118<br>(0.468)                                       | 0.049<br>(0.187)                                                   |
| Oil endowment                                  | -0.009*<br>(0.028)                                  | -0.097<br>(0.177)                                       | -0.011<br>(0.487)                                                  |
| Emergency ODA (residuals)                      | 0.006*<br>(0.016)                                   | 0.140***<br>(0.000)                                     | 0.018***<br>(0.000)                                                |
| Ideological distance from the US               | 0.004<br>(0.675)                                    | -0.171<br>(0.293)                                       | -0.095*<br>(0.025)                                                 |
| <b>Controls:</b>                               |                                                     |                                                         |                                                                    |
| Conflict                                       | 0.017<br>(0.305)                                    | -0.019<br>(0.948)                                       | 0.052<br>(0.338)                                                   |
| Drought                                        | 0.089***<br>(0.000)                                 | 1.091***<br>(0.001)                                     | 0.201**<br>(0.003)                                                 |
| Extreme temperature and co-occurring disasters | 0.087***<br>(0.000)                                 | 1.074**<br>(0.004)                                      | 0.197**<br>(0.008)                                                 |
| Flood                                          | 0.007<br>(0.764)                                    | -0.252<br>(0.291)                                       | -0.013<br>(0.729)                                                  |
| Storm                                          | 0.037**<br>(0.005)                                  | 0.245<br>(0.242)                                        | 0.032<br>(0.513)                                                   |
| <i>Number of observations</i>                  | 1731                                                | 1731                                                    | 1731                                                               |
| <i>Bayesian Information Criterion</i>          | 69.279                                              | 1193.679                                                | 310.849                                                            |
| <i>Log likelihood</i>                          | 21.284                                              | -540.916                                                | -99.501                                                            |

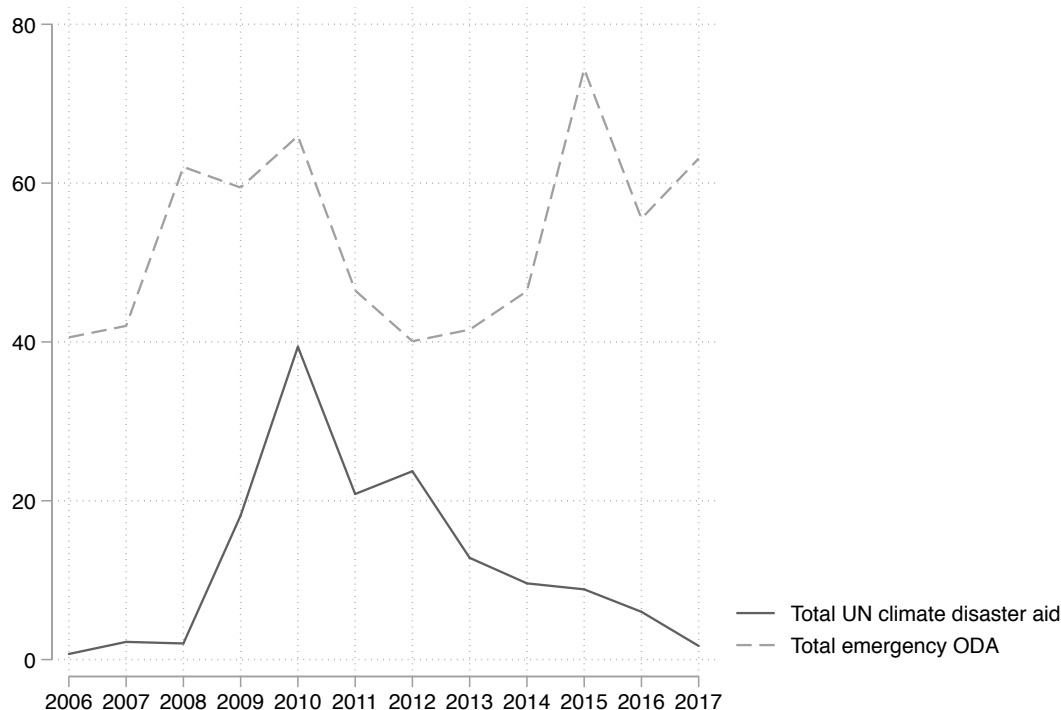

**Figure S1.** Total UN climate-related disaster aid and emergency ODA in million USD in 2010 prices. UN aid includes CERF, CBPF and other bilateral and multilateral aid coordinated by the UN. Emergency ODA is defined in the official database of the Development Assistance Committee (DAC) of the Organisation for Economic Co-operation and Development (OECD) as including all government aid after natural or humanitarian disasters, including grants, “soft loans”, and technical assistance (30).

The surge in emergency ODA and UN disaster aid between 2008 and 2010 was likely influenced by rising demand for humanitarian assistance in vulnerable countries, reflected in the total number of affected people by climate-related disasters (18). A prominent example is the 2009/2010 drought in Afghanistan which, according to CERF reports, required sustained UN assistance in the areas of agriculture, health, nutrition, water, sanitation, and hygiene over a two-year period. The total number of affected people decreased between 2010 and 2017, with the total number of affected people decreasing by 64 percent in the category of droughts; by 70 percent in the category of floods; by 92 percent in the category of landslides (total affected by extreme temperature and storms remain roughly unchanged) (18).

## References

1. Global Climate Observing System (GCOS) *Status of the Global Observing System for Climate*. World Meteorological Organization (Geneva, Switzerland, 2015).
2. N. Hofstra, M. New, C. McSweeney, The influence of interpolation and station network density on the distributions and trends of climate variables in gridded daily data. *Clim. Dyn.* **35**(5), 841–858 (2010).
3. J. de Leeuw, J. Methven, M. Blackburn, Evaluation of ERA-Interim reanalysis precipitation products using England and Wales observations. *Q. J. R. Meteorol. Soc.* **141**(688), 798–806 (2015).
4. M. Taszarek, H.E. Brooks, B. Czernecki, P. Szuster, K. Fortuniak, Climatological aspects of convective parameters over Europe: A comparison of ERA-Interim and sounding data. *J. Clim.* **31**(11), 4281–4308 (2018).
5. R. Marcos, N. González-Reviriego, V. Torralba, A. Soret, F.J. Doblas-Reyes, Characterization of the near surface wind speed distribution at global scale: ERA-Interim reanalysis and ECMWF seasonal forecasting system 4. *Clim. Dyn.* **52**(5-6), 3307–3319 (2019).
6. E. Kalnay, M. Cai, Impact of urbanization and land-use change on climate. *Nature* **423**(6939), 528–531 (2003).
7. D.P. Dee et al., The ERA-Interim reanalysis: configuration and performance of the data assimilation system. *Q. J. R. Meteorol. Soc.* **137**(656), 553–597 (2011).
8. R.C. Cornes, P.D. Jones, How well does the ERA-Interim reanalysis replicate trends in extremes of surface temperature across Europe?. *J. Geophys. Res.: Atmos.* **118**, 10262–10276 (2013).
9. T.B. McKee, N.J. Doesken, J. Kleist, “The relationship of drought frequency and duration to time scales” in *Proceedings of the 8th Conference on Applied Climatology* (Anaheim, California, 1993), pp. 179–184.
10. D.C. Edwards, T.B. McKee, *Characteristics of 20th century drought in the United States at multiple time scales*. Climatology Report No. 97-2 (Colorado State Univ, Ft Collins, CO, 1997).
11. S. Golian, M. Javadian, A. Behrangi, On the use of satellite, gauge, and reanalysis precipitation products for drought studies. *Environ. Res. Lett.* **14**, 075005 (2019).
12. A. Farahmand, A. AghaKouchak, A generalized framework for deriving nonparametric standardized drought indicators. *Adv. Water Resour.* **76**, 140–145 (2015).
13. M. Klawa, U. Ulbrich, A model for the estimation of storm losses and the identification of severe winter storms in Germany. *Nat. Hazards Earth Syst. Sci.* **3**(6), 725–732 (2003).
14. C. Schwierz et al., Modelling European winter wind storm losses in current and future climate. *Clim. Change* **101**, 485–514 (2012).
15. P.M. Della-Marta et al., The return period of wind storms over Europe. *Int. J. Climatol.* **29**, 437–459 (2009).
16. F.E. Otto, Attribution of weather and climate events. *Annu. Rev. Environ. Resour.* **42**, 627–646 (2017).
17. Easterling, DR, Kunkel KE, Wehner MF, Sun L (2016) Detection and attribution of climate extremes in the observed record. *Weather Clim Extremes*, **11**, 17–27.
18. Guha-Sapir, D, Below R, Hoyois P (2014) *EM-DAT: International Disaster Database*. Brussels: Centre for Research on the Epidemiology of Disasters (CRED), Université Catholique de Louvain. Available at <https://www.emdat.be>. Accessed May 5, 2020.
19. Global Administrative Areas (2012) *GADM database of Global Administrative Areas, version 2.0*. Available at [www.gadm.org](http://www.gadm.org). Accessed May 5, 2020.
20. UN CERF (2014a) *Resident / humanitarian coordinator report on the use of CERF funds. Guatemala. Rapid response. Drought*.
21. UN CERF (2014b) *Resident / humanitarian coordinator report on the use of CERF funds in Guatemala. Rapid response for plagues (and drought) – 2014*.
22. UN CERF (2017) *Resident / humanitarian coordinator report on the use of CERF funds. Ethiopia. Rapid response. Drought 2017*.

23. Rosvold EL, Buhaug H (2020) *Geocoded Disasters (GDIS) Dataset, 1960-2018 (Preliminary Release)*. Palisades, NY: NASA Socioeconomic Data and Applications Center (SEDAC). <https://doi.org/10.7927/zz3b-8y61>. Accessed November 18, 2020.
24. Center for International Earth Science Information Network - CIESIN - Columbia University (2018) *Gridded Population of the World, Version 4 (GPWv4): Population Count, Revision 11*. Palisades, NY: NASA Socioeconomic Data and Applications Center (SEDAC). <https://doi.org/10.7927/H4JW8BX5>. Accessed November 10, 2020.
25. Fink G, Redaelli S (2011) Determinants of international emergency aid. Humanitarian need only? *World Dev* 39(5):741–757.
26. Dreher A, Nunnenkamp P, Öhler H, Weisser J (2009) Acting autonomously or mimicking the state and peers? A panel Tobit analysis of financial dependence and aid allocation by Swiss NGOs. *KOF Working Paper No. 219*. <http://dx.doi.org/10.2139/ssrn.1362437>.
27. Dür A, Baccini L, Elsig M (2014) The design of international trade agreements: Introducing a new database". *Rev Int Org* 9(3):353–375.
28. Correlates of War Project. *Colonial Contiguity Data, 1816-2016. Version 3.1*. Available at: <https://correlatesofwar.org/data-sets/colonial-dependency-contiguity>. Accessed: November 18, 2020.
29. Hunziker P, Cederman L-E (2017) No extraction without representation: The ethno-regional oil curse and secessionist conflict. *J Peace Res* 54(3):365–381.
30. OECD (2020) OECD.Stat. <https://stats.oecd.org>. Accessed: November 18, 2020.
31. Bailey MA, Strezhnev A, Voeten E (2017) Estimating dynamic state preferences from United Nations voting data. *J Confl Resolut* 61(2):430–456.
32. Gleditsch NP, Wallensteen P, Eriksson M, Sollenberg M, Strand H (2002) Armed Conflict 1946-2001: A New Dataset. *Journal of Peace Research* 39(5):615–637.
33. Pettersson T, Högladh S, Öberg M (2019) Organized violence, 1989–2018 and peace agreements. *J Peace Res* 56(4):589–603.
34. Dreher A (2006) IMF and economic growth: The effects of programs, loans, and fompliance with fonditionality. *World Dev* 34(5):769–788.
35. Weber PM, Schneider G (2020) Post-cold war sanctioning by the EU, the UN, and the US: Introducing the EUSANCT Dataset. *Confl Manag Peace Sci*. First published August 27, 2020. <https://doi.org/10.1177/0738894220948729>.
36. Dreher A, Sturm J-E, Vreeland JR (2009) Development aid and international politics: Does membership on the UN Security Council influence World Bank decisions? *J Dev Econ* 88(1):1–18.
37. Dreher A, Lang V, Rosendorff BP, Vreeland JR (2018) Buying votes and international organizations: The dirty work-hypothesis. *CEPR Discussion Paper No. 13290*
